# Supplementary material for: Magnetically recoverable fluorescence chemosensor for the adsorption and selective detection of Hg2+in water
Source: Royal Society of Chemistry journal article supplement (doi:10.1039/c3em00462g), 2013-10-23
Supplement: c3em00462g.pdf [file c3em00462g.pdf]

## Supplementary materials

### Magnetically recoverable fluorescence chemosensor for the adsorption and selective detection of $\text{Hg}^{2+}$ in water

Qiang Lv,<sup>a</sup> Gang Li,<sup>\*a</sup> Zhuhong Cheng,<sup>a</sup> Hong Lu<sup>b</sup> and Xiaoxia Gao<sup>c</sup>

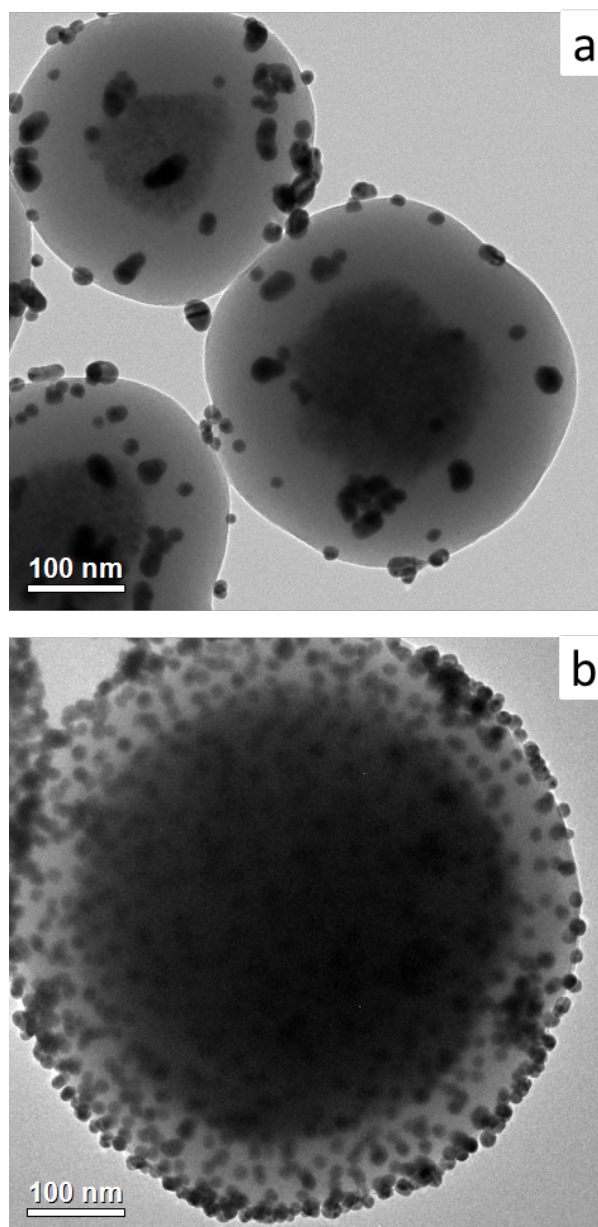

Fig. S1 Au particles on the surface of the  $\text{Fe}_3\text{O}_4@\text{SiO}_2$  were tuned by varying the amount of linker APTS.

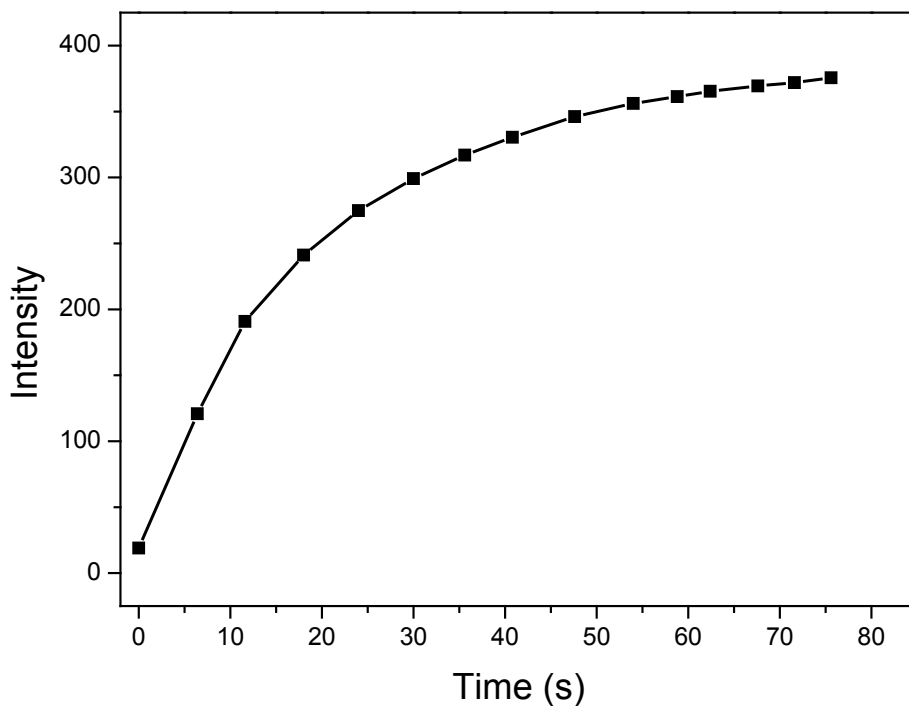

Fig. S2 Response time of  $\text{Fe}_3\text{O}_4@\text{SiO}_2\text{-Au-RhB-Tren@PSiO}_2$  with  $\text{Hg}^{2+}$  solution ( $1.25 \times 10^{-5}$  M).

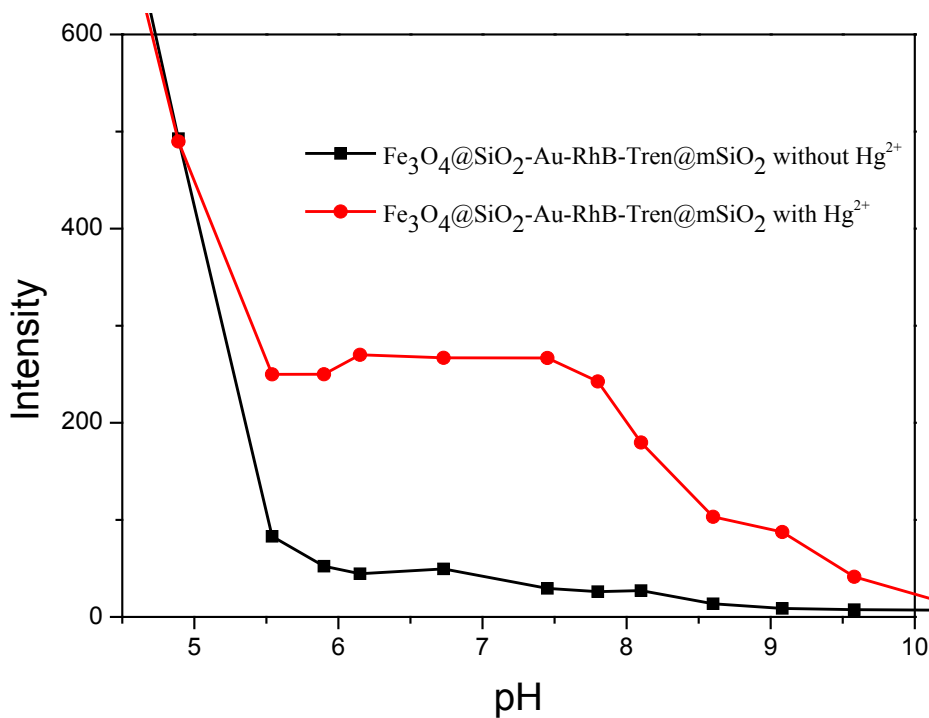

Fig. S3 Effect of pH on fluorescent intensity of  $\text{Fe}_3\text{O}_4@\text{SiO}_2\text{-Au-RhB-Tren@PSiO}_2$  without or with  $\text{Hg}^{2+}$  ( $9 \times 10^{-6}$  M).

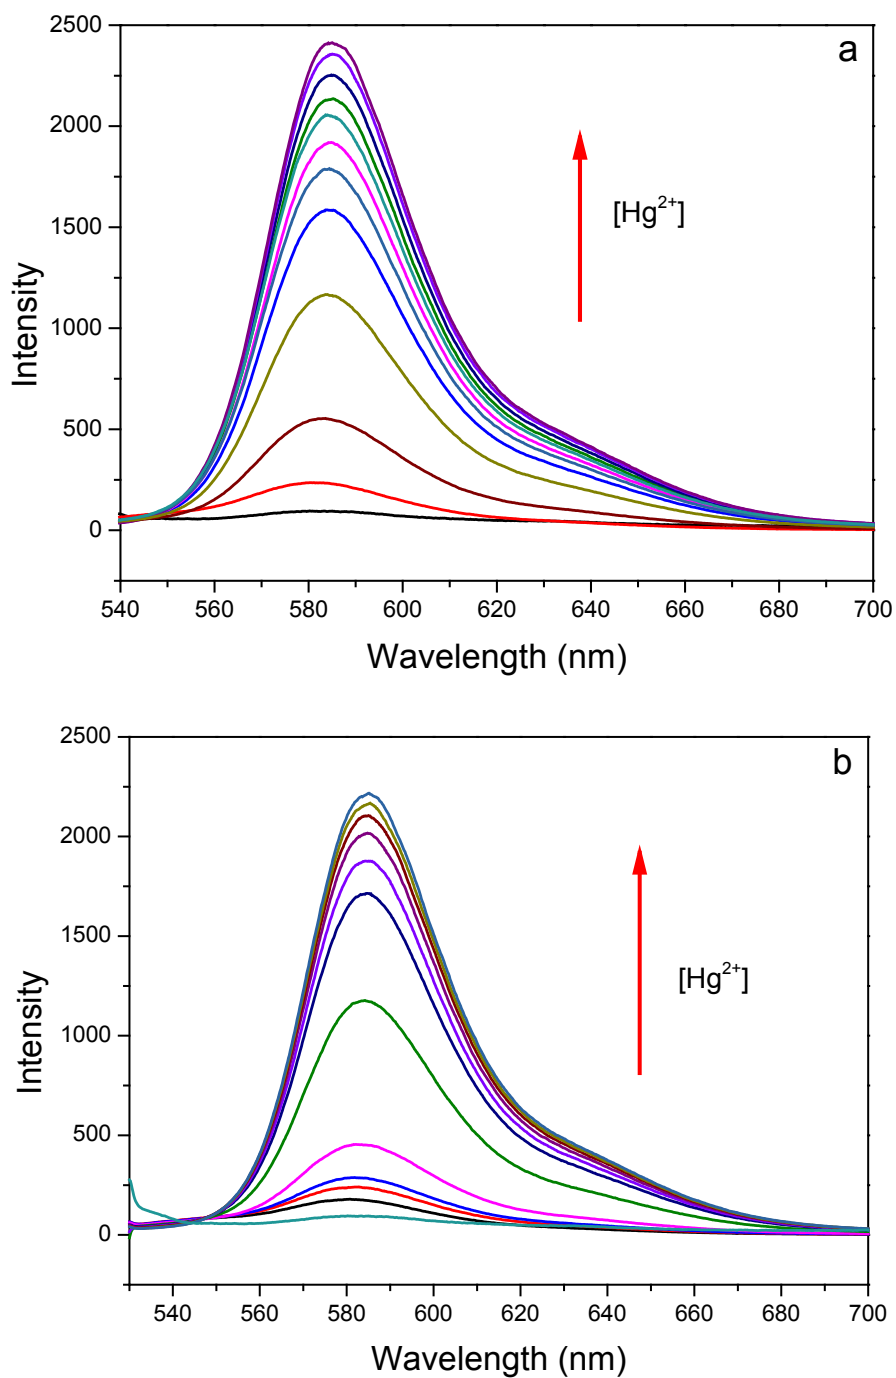

Fig. S4 Fluorescence spectra of  $\text{Fe}_3\text{O}_4@\text{SiO}_2\text{-Au-RhB-Tren}@PSiO_2$  in (a) rainwater and (b) drinking water consisting of HEPES buffer medium upon the increasing of  $\text{Hg}^{2+}$  concentrations ( $0 \sim 7.5 \times 10^{-5}$  M).
